# Supplementary material
Source: Springer Nature journal article supplement (https://www.springermedizin.de/resource/supplementary/13058_2009_2450_MOESM5_ESM.pdf/9701440)

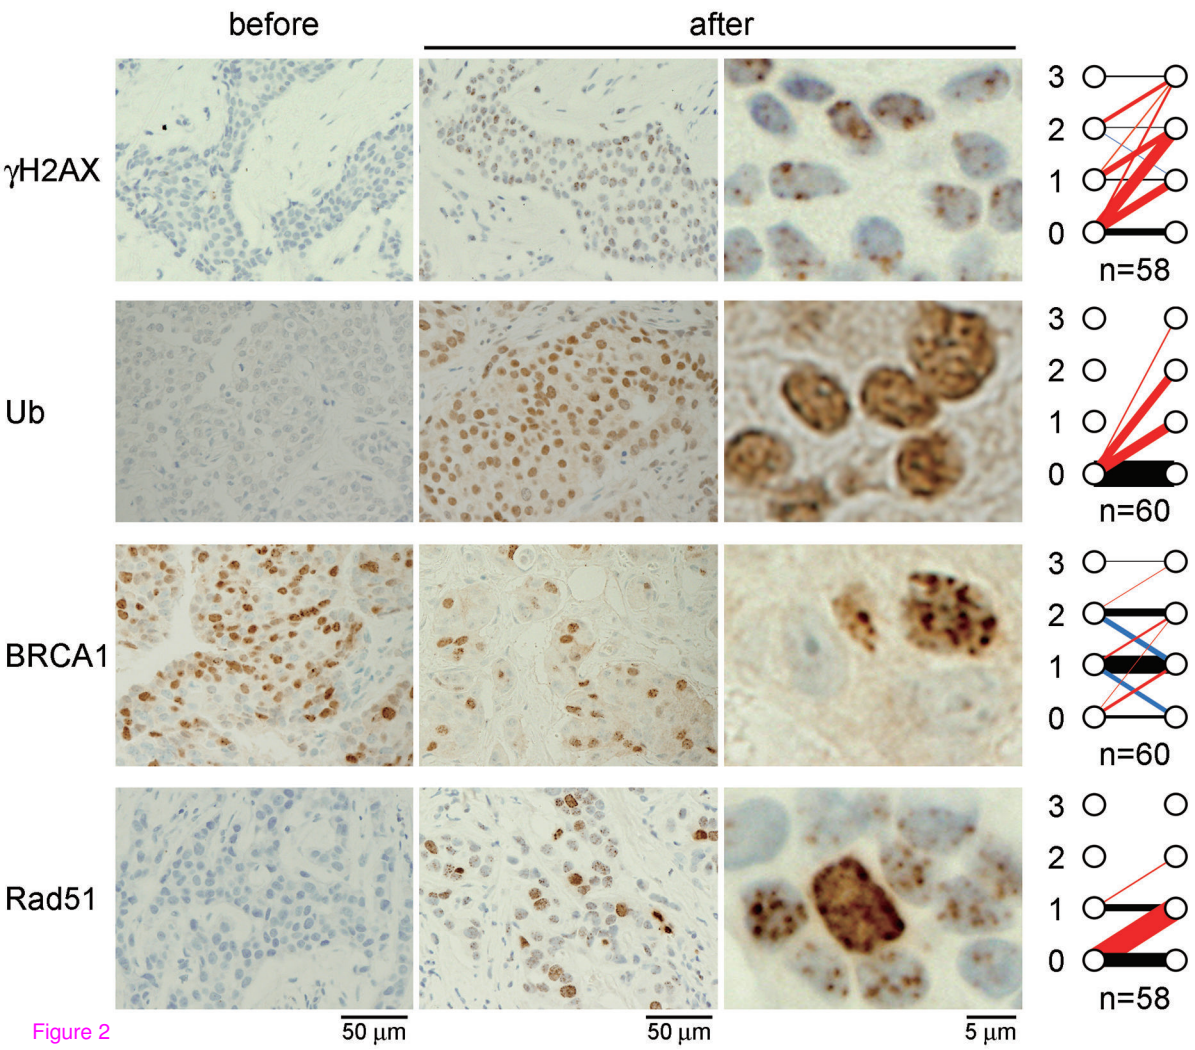

Supplement: MOESM5 [file 9701440]
